# Supplementary material
Source: PubMed Central journal article supplement (PMC9517732)
Supplement: NIHMS1836109-supplement-Appendix.pdf [file NIHMS1836109-supplement-Appendix.pdf]

## Appendix

Appendix Exhibit 1: Comparison between Medicare Enrollees in UAS and CPS

|                       | UAS         | CPS         |
|-----------------------|-------------|-------------|
| Age in years          | 74<br>(6.7) | 74<br>(6.2) |
| Distribution by Age   |             |             |
| share 65-69           | 0.34        | 0.31        |
| share 70-79           | 0.48        | 0.45        |
| share 80 and above    | 0.18        | 0.24        |
| share with HS or less | 0.46        | 0.47        |
| Nonwhite              | 0.12        | 0.23        |
| Hispanic              | 0.08        | 0.08        |
| Born in the US        | 0.93        | 0.88        |
| Male                  | 0.45        | 0.45        |
| Married               | 0.56        | 0.57        |
| Divorced              | 0.20        | 0.23        |
| Widowed               | 0.20        | 0.13        |
| Separated             | 0.00        | 0.01        |
| Never Married         | 0.04        | 0.05        |
| Other HH member       | 0.74        | 0.71        |
| Working               | 0.12        | 0.16        |
| Self-rated health     |             |             |
| share excellent       | 0.08        | 0.11        |
| share good            | 0.37        | 0.26        |
| share very good       | 0.37        | 0.35        |
| share fair            | 0.15        | 0.20        |
| share poor            | 0.03        | 0.08        |
| Observations          | 966         | 23,607      |

Notes: Weighted means for individuals ages 65 and over with Medicare.

Appendix Exhibit 2. UAS Sample Descriptive Statistics Overall and by Plan Type

| MA Plan               | Overall Sample | FFS Medicare | Medicare Advantage |    |
|-----------------------|----------------|--------------|--------------------|----|
|                       | 0.377          | 0            | 1                  |    |
| <b>Demographics</b>   |                |              |                    |    |
| Age 65-69             | 0.343          | 0.343        | 0.344              |    |
| Age 70-79             | 0.480          | 0.472        | 0.493              |    |
| Age 80 and above      | 0.177          | 0.185        | 0.164              |    |
| Nonwhite              | 0.123          | 0.107        | 0.151              | ** |
| Hispanic              | 0.080          | 0.068        | 0.100              |    |
| Male                  | 0.445          | 0.448        | 0.441              |    |
| Born in US            | 0.929          | 0.920        | 0.946              |    |
| High school or less   | 0.462          | 0.486        | 0.423              |    |
| Some College          | 0.168          | 0.163        | 0.177              |    |
| College or more       | 0.369          | 0.351        | 0.400              |    |
| <b>Marital Status</b> |                |              |                    |    |
| Married               | 0.564          | 0.588        | 0.526              |    |
| Divorced              | 0.195          | 0.168        | 0.240              | ** |
| Widowed               | 0.196          | 0.212        | 0.168              |    |
| Separated             | 0.004          | 0.004        | 0.004              |    |
| Never married         | 0.041          | 0.028        | 0.062              | *  |
| <b>Income</b>         |                |              |                    |    |
| below 25,000          | 0.235          | 0.225        | 0.252              |    |
| 25,000-49,999         | 0.303          | 0.300        | 0.309              |    |
| 50,000-74,999         | 0.222          | 0.200        | 0.259              | *  |
| 75,000+               | 0.239          | 0.275        | 0.180              | ** |
| Other HH Member       | 0.738          | 0.771        | 0.682              | ** |
| Working               | 0.116          | 0.132        | 0.090              |    |
| <b>Health Status</b>  |                |              |                    |    |
| Health rating         | 2.675          | 2.73         | 2.58               | ** |
|                       | (0.93)         | (0.98)       | (0.83)             |    |
| Mental health rating  | 2.028          | (2.06)       | (1.97)             |    |
|                       | (0.85)         | (0.86)       | (0.83)             |    |
| PHQ-2                 | 0.658          | 0.754        | 0.498              | ** |
|                       | (1.22)         | (1.35)       | (0.95)             |    |
| Depressed             | 0.079          | 0.098        | 0.046              | ** |

**Visits and Screenings**

|                                         |       |       |       |    |
|-----------------------------------------|-------|-------|-------|----|
| Welcome Visit                           | 0.392 | 0.334 | 0.489 | ** |
| AWV                                     | 0.548 | 0.471 | 0.674 | ** |
| Cog Assessment Ever                     | 0.321 | 0.274 | 0.398 | ** |
| Cog Assessment at AWV                   | 0.256 | 0.229 | 0.300 | *  |
| Ever Told Memory-related disease        | 0.023 | 0.036 | 0.003 | ** |
| Spoke to MD in past 12 mos about memory | 0.101 | 0.088 | 0.122 |    |
| Value of Screening                      | 0.637 | 0.643 | 0.626 |    |
| Observations                            | 966   | 605   | 359   |    |

Notes: The last column with stars shows whether the means for FFS Medicare and MA enrollees differ. \* means significantly different at the 5% level and \*\* at the 1% level.

Appendix Exhibit 3. Cognitive Assessments Controlling for AWV Use

| <i>Panel A: AWV</i>                         |                                      |                      |                      |
|---------------------------------------------|--------------------------------------|----------------------|----------------------|
|                                             | Ever had Cognitive Assessment at AWV |                      |                      |
| MA plan                                     | 0.0146<br>(0.0392)                   | 0.0155<br>(0.0387)   | 0.0169<br>(0.0395)   |
| AWV                                         | 0.392***<br>(0.0354)                 | 0.389***<br>(0.0347) | 0.384***<br>(0.0349) |
| Observations                                | 965                                  | 962                  | 962                  |
| Visit Rate, FFS                             | 0.229                                | 0.229                | 0.229                |
| R-squared                                   | 0.361                                | 0.384                | 0.393                |
| <i>Panel B: Cognitive Assessment at AWV</i> |                                      |                      |                      |
|                                             | Ever had Cognitive Assessment        |                      |                      |
| MA Plan indicator                           | 0.0856**<br>(0.0433)                 | 0.0870**<br>(0.0424) | 0.0927**<br>(0.0428) |
| AWV                                         | 0.281***<br>(0.0415)                 | 0.281***<br>(0.0406) | 0.286***<br>(0.0411) |
| Observations                                | 965                                  | 962                  | 962                  |
| Rate, FFS                                   | 0.274                                | 0.274                | 0.274                |
| R-squared                                   | 0.256                                | 0.283                | 0.292                |
| Basic demographics                          | x                                    | x                    | x                    |
| Marital status and income                   |                                      | x                    | x                    |
| Health Ratings                              |                                      |                      | x                    |

\*\* p<0.01, \* p<0.05, + p<0.1

Notes: Robust standard errors shown in parentheses. All models control for AWV use and include state fixed effects such that differences capture plan type deviations for people living in the same state. Basic demographics include indicators of age categories (65-69, 70-79 and 80+). Non-white race, Hispanic/Latino, male, native born, and education (high school or less, some college or college and above). Health ratings include two separate self-reported measures of physical and mental health on a 5-point scale. Models also include an indicator for a response of whether you had a cognitive assessment at an AWV (panel A) or at any visit (panel B). Respondents who indicate “Do not know” to these questions are coded as not having the visit or service.

Appendix Exhibit 4. Relationship between Medicare plan type and AWVs

| <i>Panel A: AWV</i>                             |                     |                                      |                     |
|-------------------------------------------------|---------------------|--------------------------------------|---------------------|
|                                                 |                     | Ever Had an AWV                      |                     |
| MA plan                                         | 0.162**<br>(0.0415) | 0.173**<br>(0.0424)                  | 0.164**<br>(0.0424) |
| Observations                                    | 965                 | 962                                  | 962                 |
| Visit Rate, FFS                                 | 0.471               | 0.471                                | 0.471               |
| R-squared                                       | 0.226               | 0.239                                | 0.251               |
| <i>Panel B: Cognitive Assessment at AWV</i>     |                     |                                      |                     |
|                                                 |                     | Ever had Cognitive Assessment at AWV |                     |
| MA Plan indicator                               | 0.0836*<br>(0.0405) | 0.0888*<br>(0.0403)                  | 0.0855*<br>(0.0407) |
| Observations                                    | 965                 | 962                                  | 962                 |
| Rate, FFS                                       | 0.229               | 0.229                                | 0.229               |
| R-squared                                       | 0.195               | 0.224                                | 0.240               |
| <i>Panel C: Ever had a Cognitive Assessment</i> |                     |                                      |                     |
|                                                 |                     | Ever had Cognitive Assessment        |                     |
| MA Plan indicator                               | 0.135**<br>(0.0433) | 0.140**<br>(0.0426)                  | 0.144**<br>(0.0429) |
| Observations                                    | 965                 | 962                                  | 962                 |
| Rate, FFS                                       | 0.274               | 0.274                                | 0.274               |
| R-squared                                       | 0.181               | 0.210                                | 0.217               |
| Basic demographics                              | x                   | x                                    | x                   |
| Marital status and income                       |                     | x                                    | x                   |
| Health Ratings                                  |                     |                                      | x                   |

\*\* p<0.01, \* p<0.05, + p<0.1

Notes: Robust standard errors shown in parentheses. All models include state fixed effects such that differences capture plan type deviations for people living in the same state. Basic demographics include indicators of age categories (65-69, 70-79 and 80+). Non-white race, Hispanic/Latino, male, native born, and education (high school or less, some college or college and above). Health ratings include two separate self-reported measures of physical and mental health on a 5-point scale. Models also include an indicator for a response of “Do not know” whether you had an AWV (panel A) or whether you had a cognitive assessment at an AWV (panel B) or ever (Panel C). Respondents who indicate “Do not know” to these questions are coded as not having the visit or service.

Appendix Exhibit 5. Sensitivity of Results to MA Plan Definition

|                                                                 | Main results        |                     |                     | sensitivity to MA plan definition |                     |                     |
|-----------------------------------------------------------------|---------------------|---------------------|---------------------|-----------------------------------|---------------------|---------------------|
| <i>Panel A: Annual Wellness Visit</i>                           |                     |                     |                     |                                   |                     |                     |
| MA plan                                                         | 0.162**<br>(0.0415) | 0.173**<br>(0.0424) | 0.164**<br>(0.0424) | 0.168**<br>(0.0431)               | 0.183**<br>(0.0436) | 0.177**<br>(0.0447) |
| Observations                                                    | 965                 | 962                 | 962                 | 845                               | 842                 | 842                 |
| Visit Rate, FFS                                                 | 0.471               | 0.471               | 0.471               | 0.493                             | 0.493               | 0.493               |
| R-squared                                                       | 0.226               | 0.239               | 0.251               | 0.214                             | 0.231               | 0.236               |
| <i>Panel B: Cognitive Screening at an Annual Wellness Visit</i> |                     |                     |                     |                                   |                     |                     |
| ma_plan                                                         | 0.0836*<br>(0.0405) | 0.0888*<br>(0.0403) | 0.0855*<br>(0.0407) | 0.0843*<br>(0.0417)               | 0.0859*<br>(0.0407) | 0.0761+<br>(0.0416) |
| Observations                                                    | 965                 | 962                 | 962                 | 845                               | 842                 | 842                 |
| Rate, FFS                                                       | 0.229               | 0.229               | 0.229               | 0.249                             | 0.249               | 0.249               |
| R-squared                                                       | 0.195               | 0.224               | 0.240               | 0.205                             | 0.251               | 0.265               |
| <i>Panel C: Cognitive Screening Ever</i>                        |                     |                     |                     |                                   |                     |                     |
| ma_plan                                                         | 0.135**<br>(0.0433) | 0.140**<br>(0.0426) | 0.144**<br>(0.0429) | 0.137**<br>(0.0450)               | 0.136**<br>(0.0435) | 0.137**<br>(0.0440) |
| Observations                                                    | 965                 | 962                 | 962                 | 845                               | 842                 | 842                 |
| Rate, FFS                                                       | 0.274               | 0.274               | 0.274               | 0.288                             | 0.288               | 0.288               |
| R-squared                                                       | 0.181               | 0.210               | 0.217               | 0.178                             | 0.223               | 0.236               |
| Basic demographics                                              | x                   | x                   | x                   | x                                 | x                   | x                   |
| Marital status and income                                       |                     | x                   | x                   |                                   | x                   | x                   |
| Health Ratings                                                  |                     |                     | x                   |                                   |                     | x                   |

Notes: See notes to Exhibit 3 in the main paper. The only difference here is that respondents who do not know whether they have Medicare Advantage or FFS Medicare are dropped from the sample.

Appendix Exhibit 6: Sensitivity of Results to Modeling Choice: Probit Estimates

|                                                                 | Main MA Plan Variable |                     |                     | Alternative MA Plan Variable |                     |                     |
|-----------------------------------------------------------------|-----------------------|---------------------|---------------------|------------------------------|---------------------|---------------------|
| <i>Panel A: Annual Wellness Visit</i>                           |                       |                     |                     |                              |                     |                     |
| MA plan                                                         | 0.192**<br>(0.0459)   | 0.209**<br>(0.0461) | 0.201**<br>(0.0464) | 0.181**<br>(0.0557)          | 0.189**<br>(0.0559) | 0.170**<br>(0.0559) |
| Observations                                                    | 896                   | 893                 | 893                 | 752                          | 749                 | 749                 |
| Rate, FFS                                                       | 0.509                 | 0.509               | 0.509               | 0.523                        | 0.523               | 0.523               |
| <i>Panel B: Cognitive Screening at an Annual Wellness Visit</i> |                       |                     |                     |                              |                     |                     |
| MA plan                                                         | 0.109*<br>(0.0492)    | 0.115*<br>(0.0487)  | 0.114*<br>(0.0498)  | 0.103*<br>(0.0500)           | 0.111*<br>(0.0494)  | 0.104*<br>(0.0507)  |
| Obs                                                             | 838                   | 828                 | 824                 | 762                          | 753                 | 749                 |
| Rate, FFS                                                       | 0.257                 | 0.257               | 0.257               | 0.273                        | 0.273               | 0.273               |
| <i>Panel C: Cognitive Screening Ever</i>                        |                       |                     |                     |                              |                     |                     |
| MA plan                                                         | 0.164**<br>(0.0500)   | 0.180**<br>(0.0495) | 0.191**<br>(0.0504) | 0.159**<br>(0.0512)          | 0.173**<br>(0.0506) | 0.177**<br>(0.0514) |
| Obs                                                             | 887                   | 877                 | 877                 | 805                          | 796                 | 796                 |
| Rate, FFS                                                       | 0.294                 | 0.294               | 0.294               | 0.301                        | 0.301               | 0.301               |
| Basic demographics                                              | x                     | x                   | x                   | x                            | x                   | x                   |
| Marital status and income                                       |                       | x                   | x                   |                              | x                   | x                   |
| Health Ratings                                                  |                       |                     | x                   |                              |                     | x                   |
| ** p<0.01, * p<0.05, + p<0.1                                    |                       |                     |                     |                              |                     |                     |

Notes: See notes to Exhibit 3 in the main paper. The only difference here is the use of a probit regression model.

Appendix Exhibit 7: Sensitivity of Results to Coding of “Do Not Know”

|                                                                 | Main MA Plan Variable |                     |                     | Alternative MA Plan Variable |                     |                     |
|-----------------------------------------------------------------|-----------------------|---------------------|---------------------|------------------------------|---------------------|---------------------|
| <i>Panel A: Annual Wellness Visit</i>                           |                       |                     |                     |                              |                     |                     |
| Ma plan                                                         | 0.175**<br>(0.0436)   | 0.187**<br>(0.0443) | 0.175**<br>(0.0448) | 0.174**<br>(0.0453)          | 0.189**<br>(0.0457) | 0.181**<br>(0.0470) |
| Observations                                                    | 904                   | 901                 | 901                 | 816                          | 813                 | 813                 |
| Rate, FFS                                                       | 0.509                 | 0.509               | 0.509               | 0.523                        | 0.523               | 0.523               |
| R-squared                                                       | 0.166                 | 0.181               | 0.194               | 0.161                        | 0.179               | 0.186               |
| <i>Panel B: Cognitive Screening at an Annual Wellness Visit</i> |                       |                     |                     |                              |                     |                     |
| MA plan                                                         | 0.0952*<br>(0.0451)   | 0.100*<br>(0.0447)  | 0.0944*<br>(0.0460) | 0.0881+<br>(0.0460)          | 0.0918*<br>(0.0448) | 0.0809+<br>(0.0464) |
| Obs                                                             | 863                   | 860                 | 860                 | 783                          | 780                 | 780                 |
| Rate, FFS                                                       | 0.257                 | 0.257               | 0.257               | 0.273                        | 0.273               | 0.273               |
| R-sq                                                            | 0.178                 | 0.209               | 0.225               | 0.187                        | 0.234               | 0.250               |
| <i>Panel C: Cognitive Screening Ever</i>                        |                       |                     |                     |                              |                     |                     |
| MA plan                                                         | 0.145**<br>(0.0464)   | 0.154**<br>(0.0457) | 0.162**<br>(0.0463) | 0.141**<br>(0.0478)          | 0.145**<br>(0.0464) | 0.146**<br>(0.0471) |
| Obs                                                             | 897                   | 894                 | 894                 | 813                          | 810                 | 810                 |
| Rate, FFS                                                       | 0.294                 | 0.294               | 0.294               | 0.301                        | 0.301               | 0.301               |
| R-sq                                                            | 0.163                 | 0.195               | 0.205               | 0.163                        | 0.209               | 0.222               |
| Basic demographics                                              | x                     | x                   | x                   | x                            | x                   | x                   |
| Marital status and income                                       |                       | x                   | x                   |                              | x                   | x                   |
| Health Ratings                                                  |                       |                     | x                   |                              |                     | x                   |
| ** p<0.01, * p<0.05, + p<0.1                                    |                       |                     |                     |                              |                     |                     |

Notes: See notes to Exhibit 3 in the main paper. The only difference here is that individuals who reported not knowing if they had an AWV (panel A), a cognitive assessment at an AWV (panel B) or a cognitive assessment in any setting (panel C) were dropped from the analysis.
